# Supplementary material for: Predicting and testing a gene network regulating seed germination in Arabidopsis
Source: PeerJ. 2025 Jul 7;13:e19599. doi: 10.7717/peerj.19599 (PMC12244130; doi:10.7717/peerj.19599)
Supplement: Supplemental Information 1 [file peerj-13-19599-s001.xlsx]

## Sheet: Gene groups
Table S1. Auxin-regulated genes in FUN, CSC, and DSC
	FUN	CSC	DSC	DSC/26.8	R2 when compared to a member in the same group
AFB1	11.5982	8.46172	19.3419	0.721712
AFB4	9.76493	7.09542	13.1453	0.490496	1 (vs. AFB1)
TIR1	16.351	13.6978	23.3611	0.871683	0.985 (vs. AFB1)
AFB2	11.1319	14.0046	18.8286	0.70256	0.9196 (vs. AFB5)
AFB3	29.86	47.5642	42.3312	1.57952	0.9895 (vs. AFB5)
AFB5	77.3414	145.673	44.6135	1.66468
Down-regulated by the TIR1-group AFBs
Group 1A involved in seed germination
At2g28470	35.2377	39.8397	248.326	9.2659
At4g26320	21.552	24.769	43.0818	1.60753	0.9999 (vs. At2g28470, and so for the rest of the genes)
At4g33720	13.3316	15.6529	21.1531	0.789293	1
At2g40330	213.473	303.478	131.724	4.91508	0.9752
At2g15370	9.92817	14.7645	33.4359	1.24761	0.952
At5g42180	23.288	37.4266	91.1943	3.40277	0.9202
At1g09090	7.64337	12.4257	8.0081	0.29881	0.9328
Group 1B involved in seed germination
At4g20460	7.42991	19.8161	133.138	4.96784
At4g35060	7.26283	27.5596	42.7838	1.59641	0.9971 (vs. At4g20460, and so for the rest of the genes)
At4g40010	23.0831	167.78	8.28728	0.309227	0.9991
At4g17340	3.23402	24.6976	3.45819	0.129037	0.9985
At1g15380	4.1289	36.9376	16.725	0.624067	0.9954
At2g44790	3.55248	32.9002	14.375	0.53638	0.995
At4g26220	27.442	264.082	343.968	12.8346	0.9893
At1g05260	10.1465	359.787	38.4978	1.43649	0.9821
At1g78090	6.81712	241.76	6.29139	0.234753	0.9828
Down-regulated by the AFB5-group AFBs
Group 2A
At4g12030	582.828	4.48372	4.36615	0.162916
At1g16410	616.184	4.87796	8.21756	0.306625	1 (vs. At4g12030, and so for the rest of the genes)
At1g62560	523.657	6.91496	8.4988	0.317119	1
At5g65730	187.929	3.27214	4.28262	0.159799	0.9999
At4g33790	525.354	11.4606	3.60937	0.134678	0.9998
At2g01520	2295.71	110.008	14.0746	0.525172	0.9987
At2g32530	78.8774	4.33976	3.65978	0.136559	0.9983
At1g62280	45.1585	4.73335	3.39195	0.126565	0.9925
At2g45220	626.282	78.4314	5.43912	0.202952	0.9883
At1g64780	33.36	6.06653	11.1023	0.414265	0.9763
Group 2B
At5g19890	10.6942	4.13221	5.30597	0.197984
At4g12280	168.828	83.6918	325.355	12.1401	0.9913
At1g05570	15.6218	8.07176	27.1738	1.01395	0.9847
At5g65210	17.4954	10.6295	17.7279	0.661489	0.939
Group 2C
At1g08190	15.8798	11.1106	15.2513	0.569079
At3g14940	35.5347	30.3061	12.9218	0.482156	0.9712 (vs. At1g08190, and so for the rest of the genes)
At5g35840	10.844	9.40825	7.20253	0.268751	0.9666
At2g45750	10.9084	9.58042	10.6096	0.39588	9632
At4g15390	10.2381	9.21818	28.4328	1.06092	0.9575
At2g20750	23.2378	21.3114	11.2239	0.418803	0.9466
Up-regulated by the TIR1-group AFBs
Group 3A
At2g41820	43.2569	15.2431	18.2153	0.679676
At1g23730	168.275	4.85745	4.82161	0.179911	1 (vs. At2g41820, and so for the rest of the genes)
At4g14560	164.957	5.20819	4.4265	0.165168	1
At5g49630	183.836	7.06825	5.82791	0.21746	0.999
At2g38470	603.62	38.8563	26.1511	0.975787	0.9977
At2g23170	396.888	31.9445	4.02418	0.150156	0.9824
At4g11280	68.9668	11.9148	10.3985	0.388005	0.9823
At4g18970	69.4946	12.4061	22.5928	0.843016	0.9751
At3g23030	128.976	24.9725	3.33405	0.124405	0.9786
At1g04220	994.44	198.875	600.046	22.3898	0.9739
At1g04680	51.3013	10.4334	11.2643	0.420311	0.9704
At1g59740	13.152	2.80334	2.80334	0.104602	0.9738
At3g13790	16.0008	3.58793	14.5158	0.541635	0.9637
At2g22240	52.0667	12.2123	17.0037	0.634465	0.9566
At4g37870	757.174	187.251	135.037	5.03868	0.9494
At1g70940	26.1399	6.90575	5.5969	0.20884	0.9212
At1g62570	70.6808	22.1342	5.39418	0.201275	0.925
At1g77000	198.229	62.1757	68.443	2.55385	0.921
At4g28640	44.3678	13.992	6.49518	0.242357	0.917
At4g09460	23.6852	7.7854	9.72118	0.36273	0.9018
Group 3B
At3g51895	40.2888	28.9539	210.752	7.86387
At4g26790	24.2855	10.0403	35.0256	1.30692	0.9892 (vs. At3g51895, and so for the rest of the genes)
At3g15540	83.3971	40.0483	38.7032	1.44415	0.9766
At2g30040	62.5554	32.2474	5.86983	0.219023	0.9861
At2g39700	15.7159	8.36425	39.8452	1.48676	0.9422
At2g39710	10.8369	6.5704	10.5858	0.394994	0.9287
At1g77280	83.9145	52.265	41.9972	1.56706	0.9072
Group 3C
At2g38480	18.4501	16.0532	86.7741	3.23784
At2g44310	77.7422	61.004	51.9534	1.93856	0.9998 (vs. At2g38480, and so for the rest of the genes)
At4g16670	119.393	95.2249	87.6653	3.27109	0.9958
Up-regulated by the AFB5-group AFBs
Group 4A involved in seed germination
At2g23060	10.9451	15.782	18.3748	0.685626
At5g57560	70.1772	72.9229	27.4557	1.02447	0.9999 (vs. At2g23060, and so for the rest of the genes)
At5g64100	10.2317	10.6964	17.1456	0.639762	0.9992
At1g51170	16.26	17.4055	18.5359	0.691639	0.9947
At4g30080	22.6938	25.4276	51.3844	1.91733	0.9894
At1g19050	34.3046	40.1965	4.65226	0.173592	0.9841
At4g37900	22.5852	27.0313	26.7342	0.997543	0.9742
At3g13380	28.1956	35.3669	9.12328	0.340421	0.9658
At2g34080	8.72797	11.15	14.5306	0.542188	0.9634
At4g03140	18.664	24.2521	11.5368	0.430476	0.9535
At2g28350	34.0439	44.8029	83.1466	3.10249	0.9481
At2g22420	47.1205	64.4345	4.90091	0.18287	0.9404
At1g23060	7.89654	10.8805	11.1509	0.416079	0.9312
At1g22880	8.54286	12.1052	8.56726	0.319674	0.9207
Group 4B
At4g27280	135.119	444.608	373.622	13.9411
At4g25390	21.8935	32.4648	219.281	8.18214	0.9991 (vs. At4g27280, and so for the rest of the genes)
At1g49430	48.8269	79.0185	138.29	5.16006	0.9999
At4g34150	354.25	617.348	680.012	25.3736	0.9951
At2g46950	40.0602	76.6104	78.7341	2.93784	0.9949
At4g27260	33.193	64.9591	29.804	1.11209	0.9775
At2g45400	11.3603	22.2542	80.5719	3.00641	0.9941
At4g22780	244.607	481.09	273.144	10.1919	0.9848
At2g33310	196.904	429.267	29.8955	1.11551	0.9764
At4g09890	73.0109	169.29	2.98304	0.111307	0.9709
At2g40140	126.118	299.479	73.078	2.72679	0.9545
At1g04310	20.978	53.7208	29.9267	1.11667	0.9453
At2g36220	6.83989	18.2284	12.4918	0.466113	0.9495
At4g17350	30.3603	81.868	12.326	0.459924	0.9298
At1g49450	49.326	144.91	58.7248	2.19122	0.902
At4g35420	3.68583	11.6459	13.9316	0.519837	0.9
Group 4C
At1g19230	15.9206	50.5829	594.453	22.1811
At5g14130	3.74772	11.0901	188.404	7.02999	0.917 vs. At1g19230, and so for the rest of the genes)
Group 4D
At2g22510	5.2431	109.013	532.405	19.8658
At4g13710	5.03566	17.2191	59.1791	2.20818	0.9988 (vs. At2g22510, and so for the rest of the genes)
At4g37370	6.00719	23.2686	29.3704	1.09591	0.9225
At1g68850	4.61266	18.287	165.222	6.16499	0.9984
At5g12330	42.6229	184.294	25.3222	0.944857	0.9968
At1g22990	4.92731	23.3366	57.1573	2.13273	0.9998
At1g23560	3.54349	17.8049	14.117	0.526753	0.9971
At2g02850	5.36763	27.8048	50.7006	1.89181	0.9943
At5g04340	18.4826	97.897	225.918	8.42977	0.9976
At2g40370	42.0145	230.777	305.063	11.3829	0.9998
At5g47370	95.4093	526.124	5.20885	0.19436	0.9971
At4g20390	3.68543	20.9736	122.171	4.55861	0.9316
At4g24140	4.12709	23.7036	160.622	5.99334	0.9992
At2g40000	348.99	2098.93	431.333	16.0945	0.9593
At4g38080	49.9587	312.067	1539.07	57.4278	0.9312
At2g23540	6.25247	44.6845	266.522	9.94485	0.9894
At1g49960	4.15767	30.4893	47.3187	1.76562	0.9942
At1g27730	24.0565	181.985	111.927	4.17638	0.9589
At2g38390	6.27122	123.443	261.054	9.74084	0.9815
At4g37390	8.50564	174.744	6.88627	0.25695	0.9077
