# Supplementary material for: Predicting and testing a gene network regulating seed germination in Arabidopsis
Source: PeerJ. 2025 Jul 7;13:e19599. doi: 10.7717/peerj.19599 (PMC12244130; doi:10.7717/peerj.19599)
Supplement: Supplemental Information 8 [file peerj-13-19599-s008.xlsx]

## Sheet: Sheet1
Source gene	Interaction	Target gene
AFB1	n	PYL6
AFB1	n	AGP13
AFB1	n	At4g33720
AFB1	n	FUT5
AFB1	n	At4g20460
AFB1	n	At4g26220
AFB1	n	PER3
AFB1	n	UCC2
AFB1	n	PRX64
AFB1	n	GLYI4
AFB1	n	RBOHB
AFB1	n	TIP2.2
AFB1	n	HMP39
PYL6	p	SNRK2-7
SNRK2-7	p	ABI5
SNRK2-7	p	ABI4
SNRK2-7	p	At1g51170
SNRK2-7	p	At2g34080
SNRK2-7	p	At1g78090
SNRK2-7	p	BGAL8
SNRK2-7	p	PRX17
SNRK2-7	n	PRX64
SNRK2-7	n	GLYI4
SNRK2-7	n	PRX69
SNRK2-7	n	At4g03140
ABI5	p	ABI4
ABI5	p	ABI3
ABI4	p	ABI5
ABI3	p	ABI5
ABI4	n	UCC2
ABI4	p	GRDP2
ABI4	n	XTH22
ABF5	p	PRX17
ABF5	p	PRX69
ABF5	p	At4g03140
ABF5	p	BRL3
ABF5	p	ARF10/ARF16
AFB5	p	ARR7
ABF5	p	CEL5
ABF5	p	At2g23060
ABF5	p	MDP40
BRL3	n	RBOHB
BRL3	n	TIP2.2
BRL3	n	HMP39
BRL3	p	ABI4
BRL3	p	BES1/BZR1
BRL3	n	ARF10/ARF16
BES1/BZR1	n	ABI5
BES1/BZR1	p	XTH22
BES1/BZR1	p	At1g51170
BES1/BZR1	p	At2g34080
BES1/BZR1	p	At1g78090
BES1/BZR1	p	ABI3
ARF10/ARF16	n	ABI3
