# Supplementary material for: Predicting and testing a gene network regulating seed germination in Arabidopsis
Source: PeerJ. 2025 Jul 7;13:e19599. doi: 10.7717/peerj.19599 (PMC12244130; doi:10.7717/peerj.19599)
Supplement: Supplemental Information 9 [file peerj-13-19599-s009.xlsx]

## Sheet: Sheet1
AFB1	AFB5
UCC2	BRL3
PYL6	BES1
SNRK2-7	ABI3
ABI5	ARF16
ABI4
